# Supplementary material for: Food Insecurity Is Associated with Diet Quality in Pregnancy: A Cross-Sectional Study
Source: MDPI journal article supplement (doi:10.3390/nu16091319), 2024-04-28
Supplement: s1 [file s1]

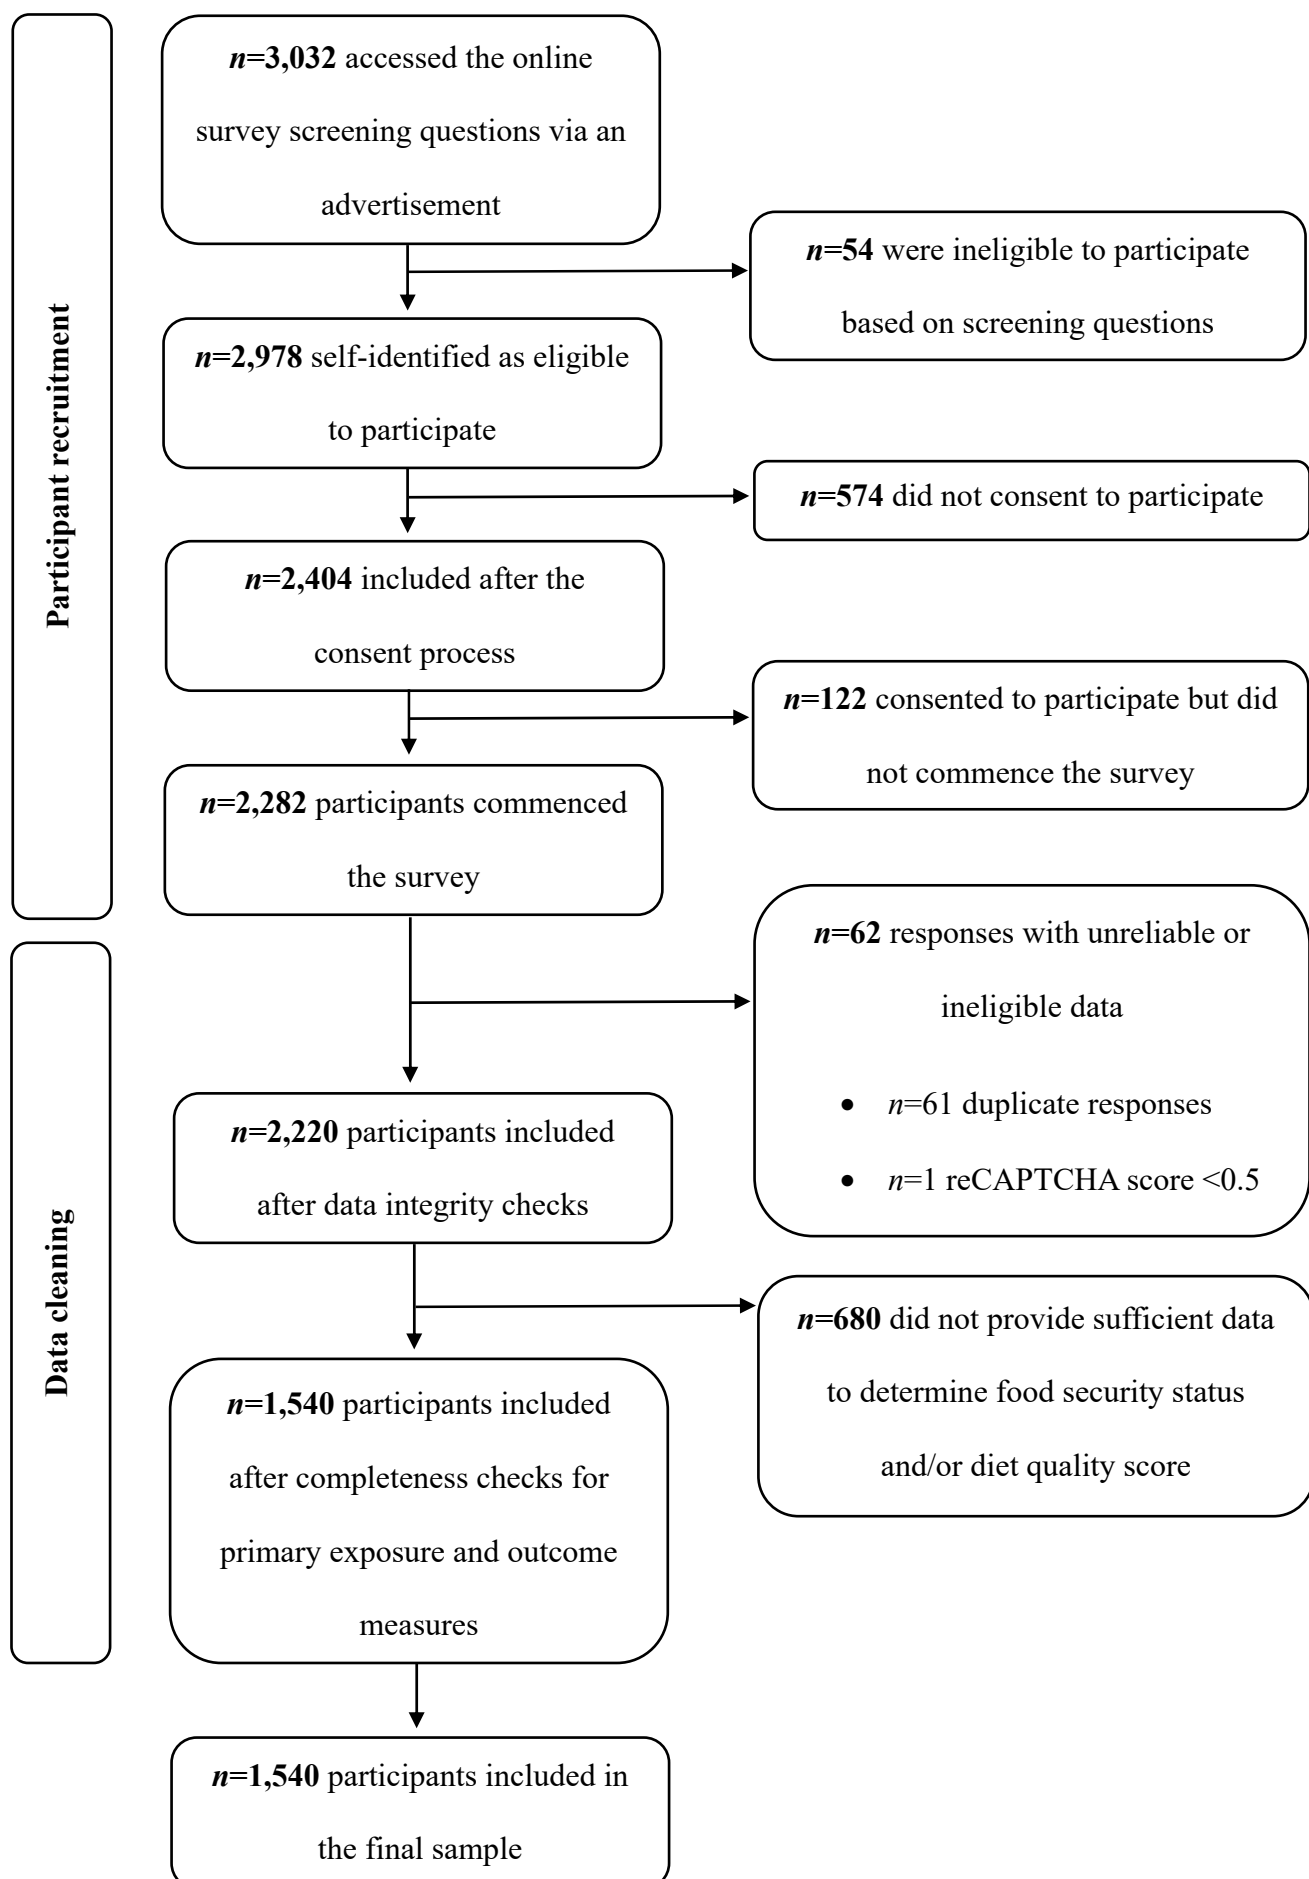

**Figure S2:** Flow diagram summarising online survey participation between August 2022 and March 2023 by pregnant women in Australia and eligibility for inclusion in the analytic sample ( $n=1,540$ ).
