# Supplementary material for: Food Insecurity Is Associated with Diet Quality in Pregnancy: A Cross-Sectional Study
Source: MDPI journal article supplement (doi:10.3390/nu16091319), 2024-04-28
Supplement: s1 [file s1]

**Table S6:** Regression modelling for associations of household food insecurity<sup>a</sup> with odds of meeting fruit intake recommendations in a sample of 1,540 pregnant women who participated in an Australian online survey

| <b>Model 1</b> ( <i>n</i> =1,540)        |                       | <b>Model 2</b> ( <i>n</i> =1,540) <sup>b</sup> |                       | <b>Model 3</b> ( <i>n</i> =1,539) <sup>c</sup> |                       | <b>Model 4</b> ( <i>n</i> =1,498) <sup>d</sup> |                       | <b>Model 5</b> ( <i>n</i> =1,532) <sup>e</sup> |                       | <b>Model 6</b> ( <i>n</i> =1,492) <sup>f</sup> |                       |
|------------------------------------------|-----------------------|------------------------------------------------|-----------------------|------------------------------------------------|-----------------------|------------------------------------------------|-----------------------|------------------------------------------------|-----------------------|------------------------------------------------|-----------------------|
| Nagelkerke <i>R</i> <sup>2</sup> : 0.036 |                       | Nagelkerke <i>R</i> <sup>2</sup> : 0.042       |                       | Nagelkerke <i>R</i> <sup>2</sup> : 0.056       |                       | Nagelkerke <i>R</i> <sup>2</sup> : 0.038       |                       | Nagelkerke <i>R</i> <sup>2</sup> : 0.039       |                       | Nagelkerke <i>R</i> <sup>2</sup> : 0.061       |                       |
| <b>OR<sup>g</sup></b>                    | <b><i>P</i> value</b> | <b>AOR<sup>b,i</sup></b>                       | <b><i>P</i> value</b> | <b>AOR<sup>c,i</sup></b>                       | <b><i>P</i> value</b> | <b>AOR<sup>d,i</sup> (95%</b>                  | <b><i>P</i> value</b> | <b>AOR<sup>e,i</sup></b>                       | <b><i>P</i> value</b> | <b>AOR<sup>f,i</sup></b>                       | <b><i>P</i> value</b> |
| <b>(95% CI<sup>h</sup>)</b>              |                       | <b>(95% CI<sup>h</sup>)</b>                    |                       | <b>(95% CI<sup>h</sup>)</b>                    |                       | <b>CI<sup>h</sup>)</b>                         |                       | <b>(95% CI<sup>h</sup>)</b>                    |                       | <b>(95% CI<sup>h</sup>)</b>                    |                       |
| 0.51                                     | <0.001                | 0.54                                           | <0.001                | 0.61                                           | <0.001                | 0.55                                           | <0.001                | 0.53                                           | <0.001                | 0.64                                           | <0.001                |
| (0.41-0.62)                              |                       | (0.44-0.67)                                    |                       | (0.49-0.76)                                    |                       | (0.44–0.70)                                    |                       | (0.43-0.65)                                    |                       | (0.50-0.81)                                    |                       |

<sup>a</sup>Reference group is high food security (food secure). Food security status was dichotomised (marginal, low, and very low food security collapsed to form the food insecure group).

<sup>b</sup>Adjusted for age.

<sup>c</sup>Adjusted for education. *N* lower due to missing data for this variable.

<sup>d</sup>Adjusted for equivalised household income. *N* lower due to missing data for this variable.

<sup>e</sup>Adjusted for relationship status. *N* lower due to missing data for this variable.

<sup>f</sup>Adjusted for age, education, equivalised household income, and relationship status. *N* lower due to missing data for these variables.

<sup>g</sup>OR: Odds ratio (unadjusted).

<sup>h</sup>CI: Confidence interval.

<sup>i</sup>AOR: Adjusted odds ratio.
