# Supplementary material for: Food Insecurity Is Associated with Diet Quality in Pregnancy: A Cross-Sectional Study
Source: MDPI journal article supplement (doi:10.3390/nu16091319), 2024-04-28
Supplement: s1 [file s1]

**Table S3:** Dietary Guidelines Index 2013 (DGI-13) criteria [1], modified for pregnancy

| <b>DGI-13 Component</b>                                                       | <b>Description/Indicator</b>                                                                                 | <b>Maximum Score</b> | <b>Criteria for Maximum Score</b> | <b>Criteria for Minimum Score</b> |
|-------------------------------------------------------------------------------|--------------------------------------------------------------------------------------------------------------|----------------------|-----------------------------------|-----------------------------------|
| <b>1. Enjoy a wide variety of nutritious foods</b>                            | Dietary variety: proportion of food from each of the five core food groups eaten at least one serve per week | 10                   | 100%                              | 0%                                |
| <b>2. Vegetables</b>                                                          | Servings of vegetables per day                                                                               | 10                   | $\geq 5$                          | 0                                 |
| <b>3. Fruit</b>                                                               | Servings of fruit per day                                                                                    | 10                   | $\geq 2$                          | 0                                 |
| <b>4. Grain (cereal) foods</b>                                                | Servings of grains/cereals per day                                                                           | 5                    | $\geq 8.5^a$                      | 0                                 |
|                                                                               | Mostly wholegrain or high fibre cereals: Type of bread usually consumed                                      | 5                    | Wholemeal/ high fibre bread       | White bread                       |
| <b>5. Lean meat and poultry, fish, eggs, nuts and seeds and legumes/beans</b> | Servings of lean meats and alternatives per day                                                              | 5                    | $\geq 3.5^a$                      | 0                                 |
|                                                                               | Proportion of lean meats and alternatives to total meat and alternatives per day                             | 5                    | 100%                              | 0%                                |

|                                                                                                |                                                         |    |                                    |                         |
|------------------------------------------------------------------------------------------------|---------------------------------------------------------|----|------------------------------------|-------------------------|
| <b>6. Milk, yoghurt, cheese and/or their alternatives</b>                                      | Servings of dairy and alternatives per day              | 10 | $\geq 2.5$                         | 0                       |
| <b>7. Drink plenty of water</b>                                                                | Total beverage intake per day (cups)                    | 5  | $\geq 9^b$                         | 0                       |
|                                                                                                | Proportion of water to total beverage intake per day    | 5  | $\geq 50\%$                        | 0%                      |
| <b>8. Limit intake of foods containing saturated fat, added salt, added sugars and alcohol</b> | Servings of discretionary foods per day                 | 10 | $\leq 2.5$                         | $> 2.5$                 |
| <b>9. Limit intake of foods high in saturated fat</b>                                          | Trimming of fat from meat                               | 5  | Usually                            | Never or rarely         |
|                                                                                                | Type of milk usually consumed                           | 5  | Skim, low fat, or reduced fat milk | Whole / full cream milk |
| <b>10. Small allowance of unsaturated oils, fats or spreads</b>                                | Servings of unsaturated oils, fats, and spreads per day | 10 | $\leq 2$                           | $> 2$                   |
|                                                                                                | Salt added during cooking                               | 5  | Never or rarely                    | Usually                 |

|                                                                               |                                                              |    |                   |          |
|-------------------------------------------------------------------------------|--------------------------------------------------------------|----|-------------------|----------|
| <b>11. Limit intake of foods and drinks containing added salt</b>             | Salt added after cooking/during the meal                     | 5  | Never or rarely   | Usually  |
| <b>12. Limit intake of foods and drinks containing added sugars</b>           | Servings of foods and drinks containing added sugars per day | 10 | $\leq 1.25$       | $> 1.25$ |
| <b>13. Not drinking alcohol is the safest option in pregnancy<sup>a</sup></b> | Alcohol intake in this pregnancy                             | 10 | None <sup>a</sup> | Any      |

<sup>a</sup>Modified to reflect recommendations for pregnancy as per the Australian Dietary Guidelines [2].

<sup>b</sup>Modified to reflect fluid recommendations in pregnancy [3].

## References

1. Thorpe, M.G.; Milte, C.M.; Crawford, D.; McNaughton, S.A. A revised Australian dietary guideline index and its association with key sociodemographic factors, health behaviors and body mass index in peri-retirement aged adults. *Nutrients* **2016**, *8*, 160, doi:10.3390/nu8030160.
2. National Health and Medical Research Council. Australian Dietary Guidelines. **2013**.
3. National Health and Medical Research Council. Nutrient Reference Values for Australia and New Zealand. Available online: <https://www.nrv.gov.au/> (accessed on August 21, 2023).
