# Supplementary material for: Food Insecurity Is Associated with Diet Quality in Pregnancy: A Cross-Sectional Study
Source: MDPI journal article supplement (doi:10.3390/nu16091319), 2024-04-28
Supplement: s1 [file s1]

**Table S5:** Sensitivity analysis (removal of outliers) for adjusted<sup>a</sup> associations of household food insecurity severity and diet quality, as measured by total Dietary Guideline Index 2013 (DGI-13) score, in a sample of 1,540 pregnant women who participated in an Australian online survey

| Original adjusted <sup>a</sup> model<br>( <i>n</i> =1,492) |                                                         |                | Sensitivity analysis <sup>b</sup><br>( <i>n</i> =1,490) <sup>b</sup> |                |
|------------------------------------------------------------|---------------------------------------------------------|----------------|----------------------------------------------------------------------|----------------|
| Adjusted <i>R</i> <sup>2</sup> : 9.9%                      |                                                         |                | Adjusted <i>R</i> <sup>2</sup> : 10.3%                               |                |
|                                                            | Adjusted <sup>a</sup> $\beta$ (95%<br>CI <sup>c</sup> ) | <i>P</i> value | Adjusted <sup>a</sup> $\beta$ (95%<br>CI <sup>c</sup> )              | <i>P</i> value |
| <b>High food security</b>                                  | Reference                                               |                | Reference                                                            |                |
| <b>Marginal food security</b>                              | -1.9 (-3.7, -0.1)                                       | 0.036          | -1.8 (-3.6, -0.1)                                                    | 0.044          |
| <b>Low food security</b>                                   | -3.6 (-5.9, -1.3)                                       | 0.002          | -3.5 (-5.7, -1.2)                                                    | 0.003          |
| <b>Very low food security</b>                              | -5.3 (-7.7, -2.8)                                       | <0.001         | -5.3 (-7.8, -2.9)                                                    | <0.001         |

<sup>a</sup>Adjusted for age, education, equivalised household income, and relationship status. *N* for models lower than total sample size (*n*=1,540) due to missing data for covariates.

<sup>b</sup>*n*=2 outliers (standardised residuals >3 SD) removed.

<sup>c</sup>CI: Confidence interval.
