# Supplementary material for: Food Insecurity Is Associated with Diet Quality in Pregnancy: A Cross-Sectional Study
Source: MDPI journal article supplement (doi:10.3390/nu16091319), 2024-04-28
Supplement: s1 [file s1]

**Table S4:** Sociodemographic characteristics of the analytic sample of 1,540 pregnant women in Australia who participated in an online survey, compared to survey respondents who dropped out and/or did not provide sufficient data to be included in the study

|                        | Mean (SD <sup>a</sup> ) or <i>n</i> (%) |                                                                            |                             |
|------------------------|-----------------------------------------|----------------------------------------------------------------------------|-----------------------------|
|                        | Analytic sample<br>( <i>n</i> =1,540)   | Respondents<br>unable to be<br>included in<br>analytic sample <sup>b</sup> | <i>P</i> value <sup>c</sup> |
| Age (years)            | 30.6 (4.5)                              | 29.7 (4.9) <sup>d</sup>                                                    | <0.001                      |
| <b>Trimester</b>       |                                         |                                                                            | 0.307                       |
| First                  | 307 (19.9)                              | 154 (22.6)                                                                 |                             |
| Second                 | 703 (45.6)                              | 293 (43.1)                                                                 |                             |
| Third                  | 530 (34.4)                              | 233 (34.3)                                                                 |                             |
| <b>Pregnancy type</b>  |                                         |                                                                            | 0.212                       |
| Singleton              | 1516 (98.4)                             | 672 (98.8)                                                                 |                             |
| Twins                  | 24 (1.6)                                | 7 (1.0)                                                                    |                             |
| Triplets or more       | 0 (0)                                   | 1 (0.1)                                                                    |                             |
| <b>Pregnancy care</b>  |                                         |                                                                            | 0.518                       |
| Public                 | 1073 (71.2)                             | 475 (72.5)                                                                 |                             |
| Private                | 435 (28.8)                              | 180 (27.5)                                                                 |                             |
| Missing                | 32                                      | 25                                                                         |                             |
| <b>Previous births</b> |                                         |                                                                            | 0.619                       |
| 0                      | 855 (55.5)                              | 365 (53.7)                                                                 |                             |
| 1                      | 462 (30.0)                              | 218 (32.1)                                                                 |                             |

|                                                     |             |            |        |
|-----------------------------------------------------|-------------|------------|--------|
| >1                                                  | 223 (14.5)  | 97 (14.3)  |        |
| <b>Children in household</b>                        |             |            | 0.088  |
| No                                                  | 817 (53.1)  | 269 (48.8) |        |
| Yes                                                 | 723 (46.9)  | 282 (51.2) |        |
| Missing                                             | 0           | 129        |        |
| <b>Born in Australia</b>                            |             |            | 0.964  |
| No                                                  | 267 (17.5)  | 114 (17.6) |        |
| Yes                                                 | 1260 (82.5) | 535 (82.4) |        |
| Missing                                             | 13          | 31         |        |
| <b>Aboriginal and/or Torres Strait<br/>Islander</b> |             |            | 0.073  |
| No                                                  | 1495 (97.1) | 625 (95.6) |        |
| Yes                                                 | 45 (2.9)    | 29 (4.4)   |        |
| Missing                                             | 0           | 26         |        |
| <b>Married / De facto</b>                           |             |            | 0.101  |
| No                                                  | 105 (6.9)   | 58 (8.9)   |        |
| Yes                                                 | 1427 (93.1) | 596 (91.1) |        |
| Missing                                             | 8           | 26         |        |
| <b>Bachelor degree or higher</b>                    |             |            | <0.001 |
| No                                                  | 621 (40.4)  | 323 (49.2) |        |
| Yes                                                 | 918 (59.6)  | 333 (50.8) |        |
| Missing                                             | 1           | 24         |        |
| <b>Household income (AUD<sup>e</sup>)</b>           |             |            | <0.001 |
| \$0-\$25,999                                        | 54 (3.6)    | 27 (5.9)   |        |

|                                               |             |            |
|-----------------------------------------------|-------------|------------|
| \$26,000-\$51,999                             | 110 (7.3)   | 56 (12.3)  |
| \$52,000-\$103,999                            | 415 (27.7)  | 142 (31.1) |
| \$104,000-\$207,999                           | 705 (47.1)  | 180 (39.4) |
| ≥\$208,000                                    | 214 (14.3)  | 52 (11.4)  |
| Missing                                       | 42          | 223        |
| <b>Household income (AUD<sup>c</sup>)</b>     |             | <0.001     |
| <\$104,000 per year                           | 579 (38.7)  | 225 (49.2) |
| ≥\$104,000 per year                           | 919 (61.3)  | 232 (50.8) |
| Missing                                       | 42          | 223        |
| <b>Low SES<sup>f</sup> area</b>               |             | 0.002      |
| No (IRSAD <sup>g</sup> deciles 4-10)          | 1216 (79.2) | 407 (72.7) |
| Yes (IRSAD <sup>g</sup> deciles 1-3)          | 319 (20.8)  | 153 (27.3) |
| Missing                                       | 5           | 120        |
| <b>Smoking status</b>                         |             | 0.464      |
| Non-smoker                                    | 1503 (97.6) | 626 (97.1) |
| Smoker (any frequency)                        | 37 (2.4)    | 19 (2.9)   |
| Missing                                       | 0           | 35         |
| <b>Pre-pregnancy BMI<sup>h</sup> category</b> |             | 0.662      |
| <18.5                                         | 52 (3.5)    | 20 (3.6)   |
| 18.5-24.9                                     | 720 (48.6)  | 267 (47.8) |
| 25.0-29.9                                     | 372 (25.1)  | 131 (23.4) |
| ≥30.0                                         | 337 (22.8)  | 141 (25.2) |
| Missing                                       | 59          | 121        |

<sup>a</sup>SD: Standard deviation.

<sup>b</sup>Maximum of  $n=680$ .  $N$  varies for each variable, depending on when respondents dropped out of the survey.

<sup>c</sup> $P$  values derived from an independent samples  $t$ -test for age (continuous variable) and  $\chi^2$  tests or Fisher's exact tests (if assumptions for  $\chi^2$  test were violated) for all other variables (categorical).

<sup>d</sup> $n=662$

<sup>e</sup>AUD: Australian dollars.

<sup>f</sup>SES: Socioeconomic status.

<sup>g</sup>IRSAD: Index of Relative Socioeconomic Advantage and Disadvantage. Deciles were derived from self-reported residential postcode, as an indicator of area-level socioeconomic status. Lower deciles reflect higher relative socioeconomic disadvantage and lower relative advantage in the area (vice versa for higher deciles).

<sup>h</sup>BMI: Body mass index.
