# Supplementary material for: Food Insecurity Is Associated with Diet Quality in Pregnancy: A Cross-Sectional Study
Source: MDPI journal article supplement (doi:10.3390/nu16091319), 2024-04-28
Supplement: s1 [file s1]

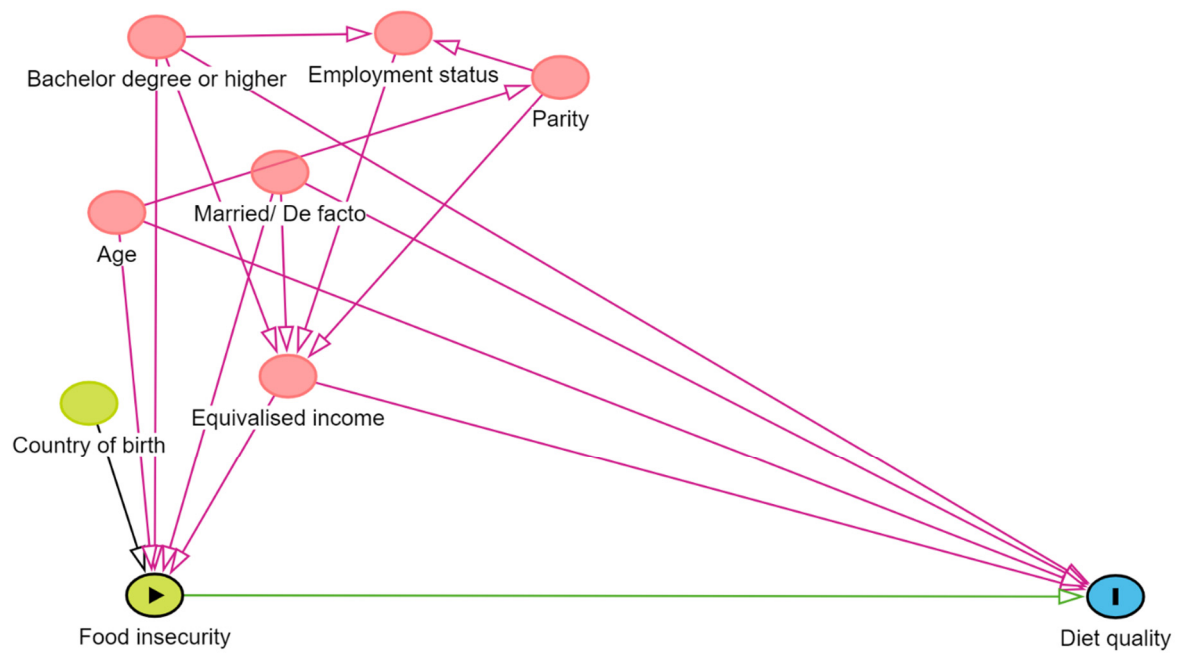

**Figure S1:** Directed acyclic graph<sup>a</sup> visualising the assumed relationship between household food insecurity and prenatal diet quality. <sup>a</sup>Simplified version for clarity. Exposure variable: household food insecurity; Outcome variable: prenatal diet quality; Pink nodes: potential confounding factors; Green nodes: ancestor of the exposure.
