# Supplementary material for: Food Insecurity Is Associated with Diet Quality in Pregnancy: A Cross-Sectional Study
Source: Nutrients. 2024 Apr 28;16(9):1319. doi: 10.3390/nu16091319 (PMC11085356; doi:10.3390/nu16091319)
Supplement: Supplementary file 1 [file nutrients-16-01319-s001.zip]

Archive with 10 entries (10 files):
- FigureS1.pdf
- FigureS2.pdf
- TableS1_STROBEChecklist.pdf
- TableS2_CHERRIES.pdf
- TableS3.pdf
- TableS4.pdf
- TableS5.pdf
- TableS6.pdf
- TableS7.pdf
- TableS8.pdf
